# Supplementary material for: Tousled-like kinase regulates cytokine-mediated communication between cooperating cell types during collective border cell migration
Source: PubMed Central journal article supplement — Mol Biol Cell. 2016 Jan 1;27(1):12–9. doi: 10.1091/mbc.E15-05-0327 (PMC4694751; doi:10.1091/mbc.e15-05-0327), 2016-01-01
Supplement: supp_E15-05-0327v1_CombinedSupMats.pdf [file supp_E15-05-0327v1_CombinedSupMats.pdf]

# Supplemental Materials

*Molecular Biology of the Cell*

Xiang et al.

## SUPPLEMENTAL MATERIAL

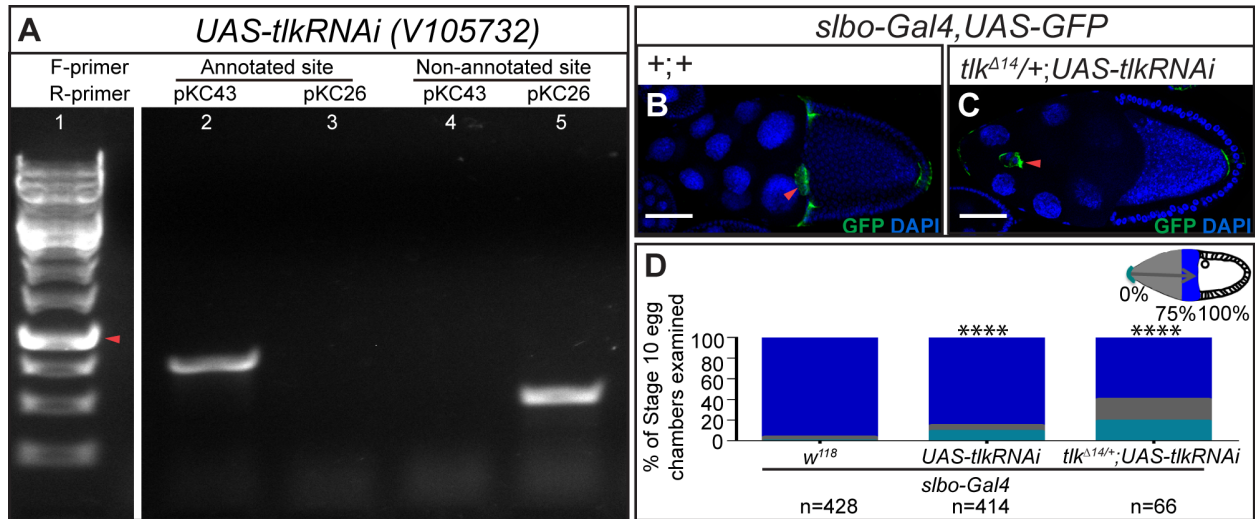

**Supplemental Figure 1.** PCR-based diagnosis of *UAS-tlkRNAi (V105732)* and phenotype test in border cells. (A) Lane 1 shows the 1kb ladder. Red arrowhead points to 1kb. The forward primer for lanes 2 and 3 is from the so-called annotated site. Reverse primers are for the pKC43 vector (lane 2) and the pKC26 vector (lane 3). In lanes 4 and 5, the forward primer is from the so-called non-annotated site and reverse primers are from pKC43 vector (lane 4) and pKC26 vector (lane 5). The white line in between lanes 1 and 2 indicates the deletion of some irrelevant lanes. (B, C) Confocal micrographs of Stage 10 egg chambers of the indicated genotypes. Red arrowheads indicate border cell clusters. Scale bars, 50  $\mu$ m. (D) Quantification of migration defects in the indicated genotypes. Flies were fattened at 29°C. We adopted Mann-Whitney U test to analyze the statistics significance of border cell migration defect, and \*\*\*\* indicates  $p < 0.0001$ .

**Supplemental Table 1.** Tlk is not required for polar cell or border cell viability.

| Cell type            | Genotype                                                | % of cCasp-3 <sup>+</sup> egg chambers | N   |
|----------------------|---------------------------------------------------------|----------------------------------------|-----|
| Polar cells          | <i>upd-Gal4, UAS-RFP</i>                                | 0                                      | 101 |
|                      | <i>tlk<sup>Δ14</sup>/upd-Gal4, UAS-RFP, UAS-tlkRNAi</i> | 0                                      | 71  |
| Border cells         | <i>tlk<sup>Δ14</sup>/upd-Gal4, UAS-RFP, UAS-tlkRNAi</i> | 0                                      | 71  |
| Other follicle cells | <i>FRT101</i> clone                                     | 2.44                                   | 41  |
|                      | <i>tlk<sup>Δ14</sup></i> clone                          | 42.86                                  | 84  |

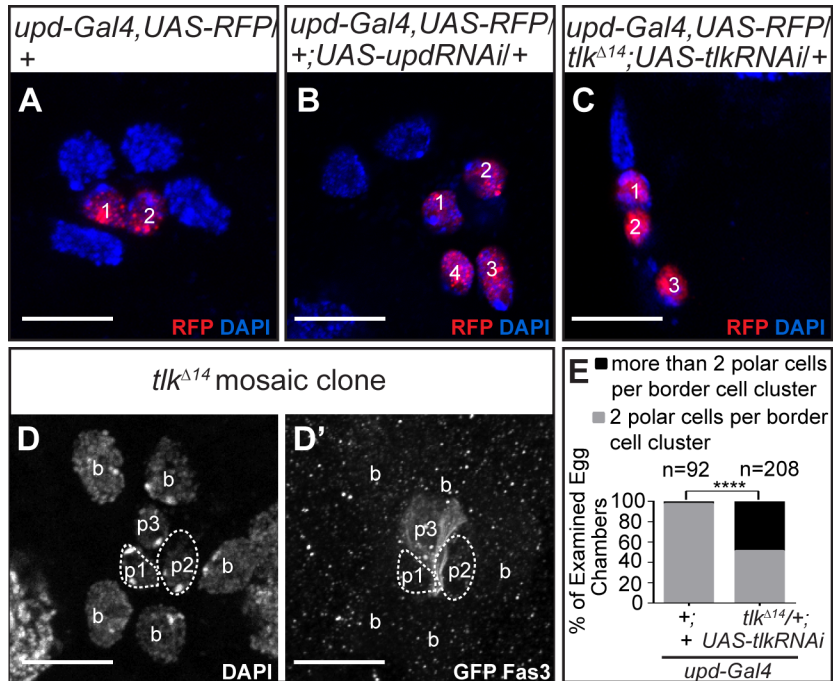

**Supplemental Figure 2.** *tlk* mutation in polar cells causes extra polar cells.

(A-D') Confocal micrographs of border cell clusters in indicated genotypes. (A-C) RFP and numerals label polar cells. (D and D') A border cell cluster containing two *tlk* mutant polar cells (p1 and p2, GFP-negative and Fas3-positive, circled by white dotted lines) and one wild type polar cell (p3, GFP-positive and Fas3-positive). Polar cells and border cells are labeled with "p" and "b", respectively. Scale bars, 10  $\mu$ m. (E) Quantification of egg chambers containing more than two polar cells per cluster. 52% of *upd-Gal4*>*UAS-tlkRNAi* egg chambers contained more than two anterior polar cells. We used t-test for statistical significance, and \*\*\*\* indicates p<0.0001.

**Supplemental Table 2.** Candidate border cell migration genes identified in the RNAi screen.

| Gene         | RNAi lines tested in 1 <sup>o</sup> screen | Border cell defect | Additional RNAi lines tested | Border cell defect | Mutant alleles tested                              | Border cell defect |
|--------------|--------------------------------------------|--------------------|------------------------------|--------------------|----------------------------------------------------|--------------------|
| <i>tlk</i>   | V105732                                    | +                  | B33983<br>B36102<br>B35298   | +                  | <i>tlk</i> <sup>Δ14</sup><br>N.D.<br>N.D.          | +                  |
| <i>dom</i>   | V7787<br>V7789                             | +                  | N.D.<br>N.D.                 |                    | <i>dom</i> <sup>1</sup><br><i>dom</i> <sup>3</sup> | +                  |
| <i>asf1</i>  | V23737<br>V23738<br>V107711                | +                  | N.D.<br>N.D.<br>N.D.         |                    | N.D.<br>N.D.<br>N.D.                               |                    |
| <i>HDAC4</i> | V20522                                     | +                  | N.D.                         |                    | N.D.                                               |                    |
| <i>not</i>   | V45775<br>V45776                           | +                  | N.D.<br>N.D.                 |                    | N.D.<br>N.D.                                       |                    |
| <i>Usp7</i>  | V18231                                     | +                  | N.D.                         |                    | N.D.                                               |                    |
| <i>Mt2</i>   | V37815                                     | +                  | N.D.                         |                    | N.D.                                               |                    |
| <i>phol</i>  | V26196                                     | +                  | N.D.                         |                    | N.D.                                               |                    |
| <i>piwi</i>  | V22235                                     | +                  | N.D.                         |                    | N.D.                                               |                    |

N.D. not determined
